# Supplementary material
Source: Springer Nature journal article supplement (https://www.springermedizin.de/resource/supplementary/12935_2009_233_MOESM2_ESM.pdf/9540158)

Ratio  $\log_2$  (Cancer/Normal)

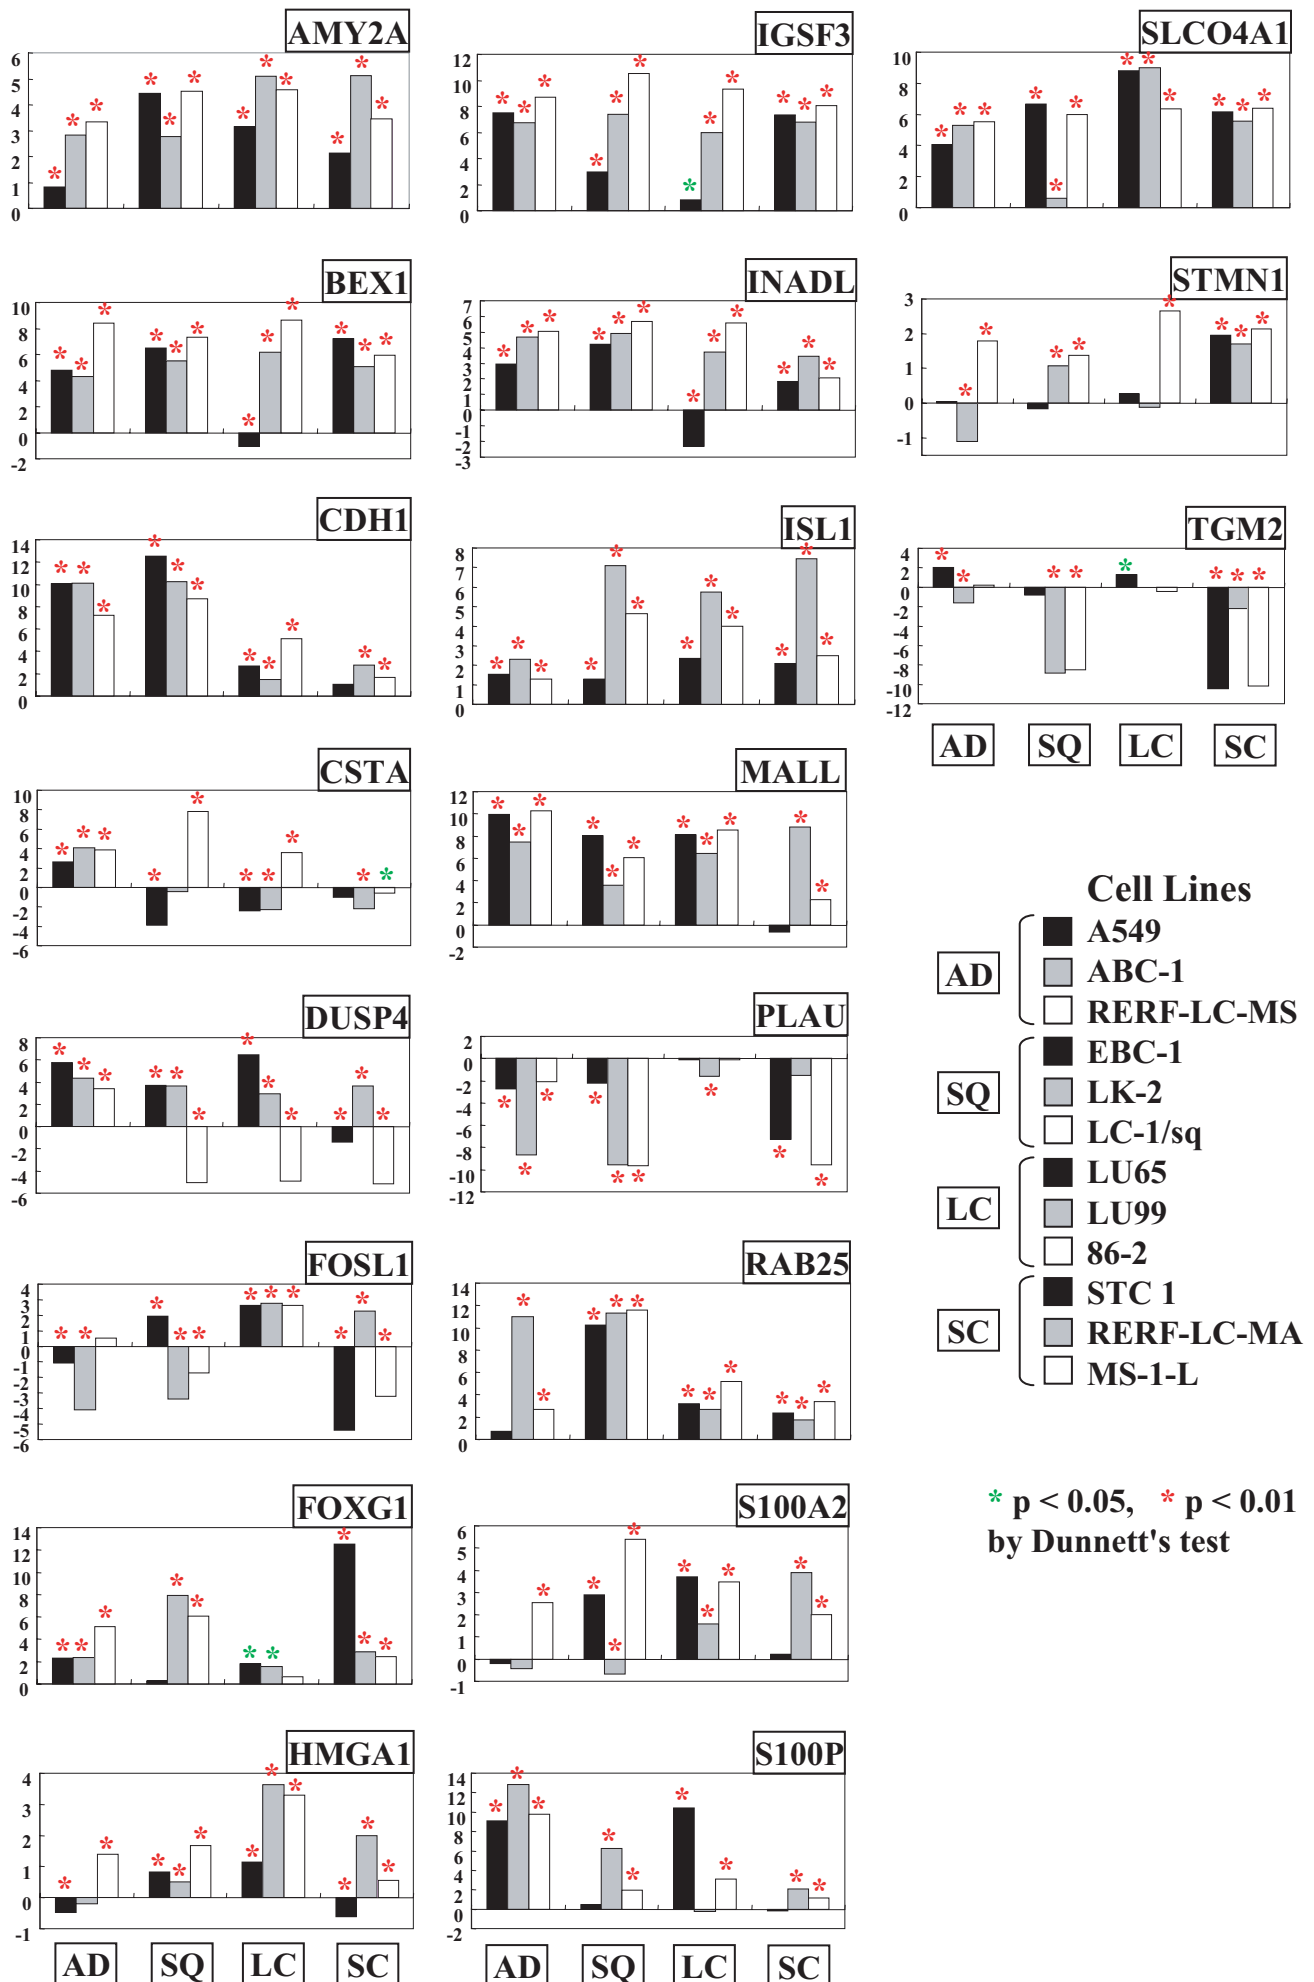

Supplement: MOESM2 [file 9540158]
